# Supplementary material for: Silver-Coated Gold Nanorods as Optical Probes for the Sensitive Detection of Ascorbic Acid in Tablets
Source: MDPI journal article supplement (doi:10.3390/chemosensors10120543), 2022-12-18
Supplement: s1 [file s1]

# **Electronic Supplementary Information (ESI)**

*for*

## **Silver coated gold nanorods as optical probe for the sensitive detection of ascorbic acid in tablets**

Shuai Wen <sup>1</sup>, Min Huang <sup>1</sup>, Ru Cheng <sup>1</sup>, Jie Gao <sup>2,\*</sup>, Jian Wang <sup>1,\*</sup>

<sup>1</sup> Key Laboratory of Luminescence Analysis and Molecular Sensing (Southwest University),  
Ministry of Education, College of Pharmaceutical Sciences, Southwest University,  
Chongqing 400715, China

<sup>2</sup> Department of biological and chemical Engineering, Chongqing University of Education,  
Chongqing 400067, China

\* Correspondence: Tel.: +86-23-68254059 (J. W.), Fax: +86-023-68367257 (J. W.), E-mail address:  
gaoj@cque.edu.cn (J. G.); wj123456@swu.edu.cn (J. W.).

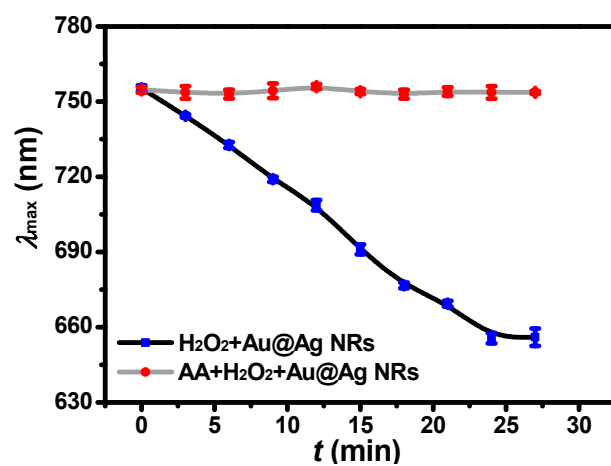

**Figure S1.** Time-dependent etching. Conditions: AA, 17.5  $\mu$ M; Au@AgNRs, 50  $\mu$ L; H<sub>2</sub>O<sub>2</sub>, 450  $\mu$ M; Fe<sup>2+</sup>, 0.25 mM; HCl, 0.10 M; T, 45 °C.

**Table S1. 11 sets  $\lambda_{\max}$  of blank samples**

| <b>Samples No.</b> | <b><math>\lambda_{\max}</math></b> |
|--------------------|------------------------------------|
| 1                  | 649                                |
| 2                  | 649                                |
| 3                  | 650                                |
| 4                  | 651                                |
| 5                  | 650.5                              |
| 6                  | 648                                |
| 7                  | 650                                |
| 8                  | 651                                |
| 9                  | 649.5                              |
| 10                 | 650.5                              |
| 11                 | 648                                |

Conditions: Au@AgNRs, 50  $\mu$ L; H<sub>2</sub>O<sub>2</sub>, 450  $\mu$ M; Fe<sup>2+</sup>; 0.25 mM; HCl, 0.10 M; *t*, 25 min; T, 45 °C.

**Table S2.** Real sample test results detected by iodometry (n=3)

| Sample manufacturer                       | Detected AA in each tablet (g) | Labeled content in each tablet (g) | Percentage of labeled content (%) | RSD (%) |
|-------------------------------------------|--------------------------------|------------------------------------|-----------------------------------|---------|
| Huazhong Pharmaceutical Co., Ltd          | 0.09926±0.0002                 | 0.1000                             | 99.26±0.15                        | 0.17    |
| Northeast Pharmaceutical Group Co., Ltd   | 0.1005±0.0003                  | 0.1000                             | 100.50±0.05                       | 0.08    |
| South China Pharmaceutical Group Co., Ltd | 0.09859±0.00032                | 0.1000                             | 98.59±0.1                         | 0.08    |

Conditions: acetic acid, 0.1 M; starch indicator solution, 1 mL; iodine, 0.05 M.

**Table S3.** Real sample test results detected by the proposed method (n=3)

| Sample manufacturer                       | Detected AA in each tablet (g) | Labeled content in each tablet (g) | Percentage of labeled content (%) | RSD (%) |
|-------------------------------------------|--------------------------------|------------------------------------|-----------------------------------|---------|
| Huazhong Pharmaceutical Co., Ltd          | 0.1014±0.0004                  | 0.1000                             | 101.40±0.4                        | 0.47    |
| Northeast Pharmaceutical Group Co., Ltd   | 0.1007±0.0011                  | 0.1000                             | 100.70±0.19                       | 0.62    |
| South China Pharmaceutical Group Co., Ltd | 0.09825±0.0008                 | 0.1000                             | 98.25±2.38                        | 2.83    |

Conditions: Au@AgNRs, 50 uL; H<sub>2</sub>O<sub>2</sub>, 450 μM; Fe<sup>2+</sup>; 0.25 mM; HCl, 0.10 M; *t*, 25 min; T, 45 °C.
